# Supplementary material for: Rapid detection of Candida albicans in urine by an Electrochemical Impedance Spectroscopy (EIS)-based biosensor
Source: Royal Society of Chemistry journal article supplement (doi:10.1039/d3sd00209h), 2023-01-01
Supplement: d3sd00209h1.pdf [file d3sd00209h1.pdf]

## Rapid detection of *Candida albicans* in urine by Electrochemical Impedance Spectroscopy (EIS)-based biosensor

Tina D'Aponte<sup>a</sup>, Maria De Luca<sup>a</sup>, Nikola Sakač<sup>b</sup>, Martina Schibeci<sup>c</sup>, Angela Arciello<sup>c</sup>, Emanuela Roscetto<sup>d</sup>, Maria Rosaria Catania<sup>d</sup>, Vincenzo Iannotti<sup>a,e</sup>, Raffaele Velotta<sup>a</sup> and Bartolomeo Della Ventura<sup>a</sup>

<sup>a</sup>Department of Physics "Ettore Pancini", University of Naples "Federico II", 80126 Naples, (Italy).

<sup>b</sup>Faculty of Geotechnical Engineering, University of Zagreb, 42000 Varaždin, Croatia.

<sup>c</sup>Department of Chemical Sciences, University of Naples "Federico II", 80126 Naples, Italy.

<sup>d</sup>Department of Molecular medicine and medical biotechnology, University of Naples "Federico II", 80131 Naples, (Italy).

<sup>e</sup>CNR – SPIN (Institute for Superconductors, Oxides and other Innovative Materials and Devices), Piazzale V. Tecchio 80, 80125 Naples, Italy

### Table of contents

Figure S1. CV and EIS measurements before and after the electrochemical cleaning of the electrode

Figure S2. Typical EIS spectrum and Randles circuit.

Figure S3. The ratio  $r_f$  as a function of the different flow rates

Figure S4. The ratio  $r_f$  as a function of the numbers of functionalization stages

Figure S5. Dose-response curve of *C. albicans* in GYP

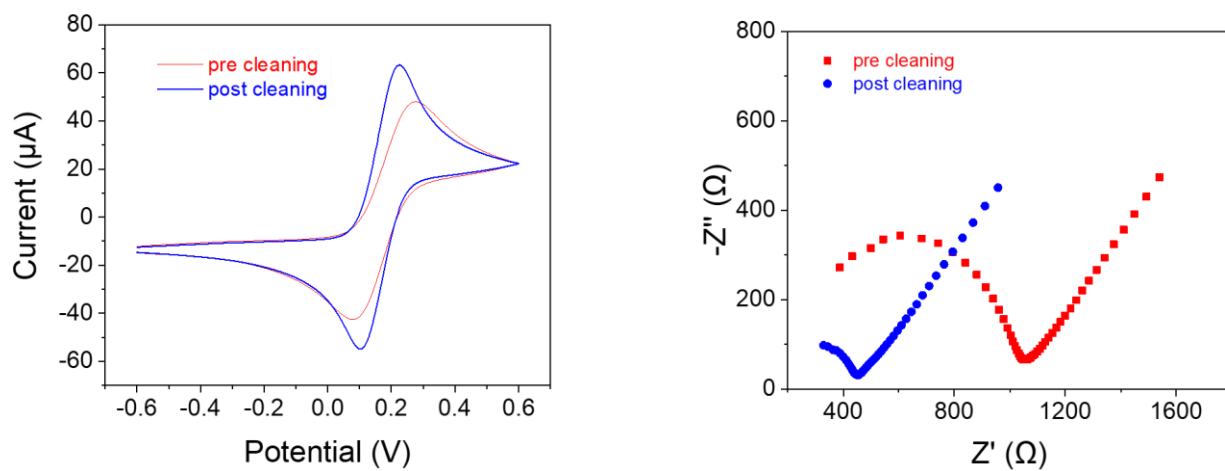

**Figure S1.** (a) CV and (b) EIS measurements conducted before and after the electrochemical cleaning of the gold electrode with  $\text{H}_2\text{SO}_4$ . The cleaning process leads to an increase in the current of CV (a), and a decrease of  $R_{ct}$  (b).

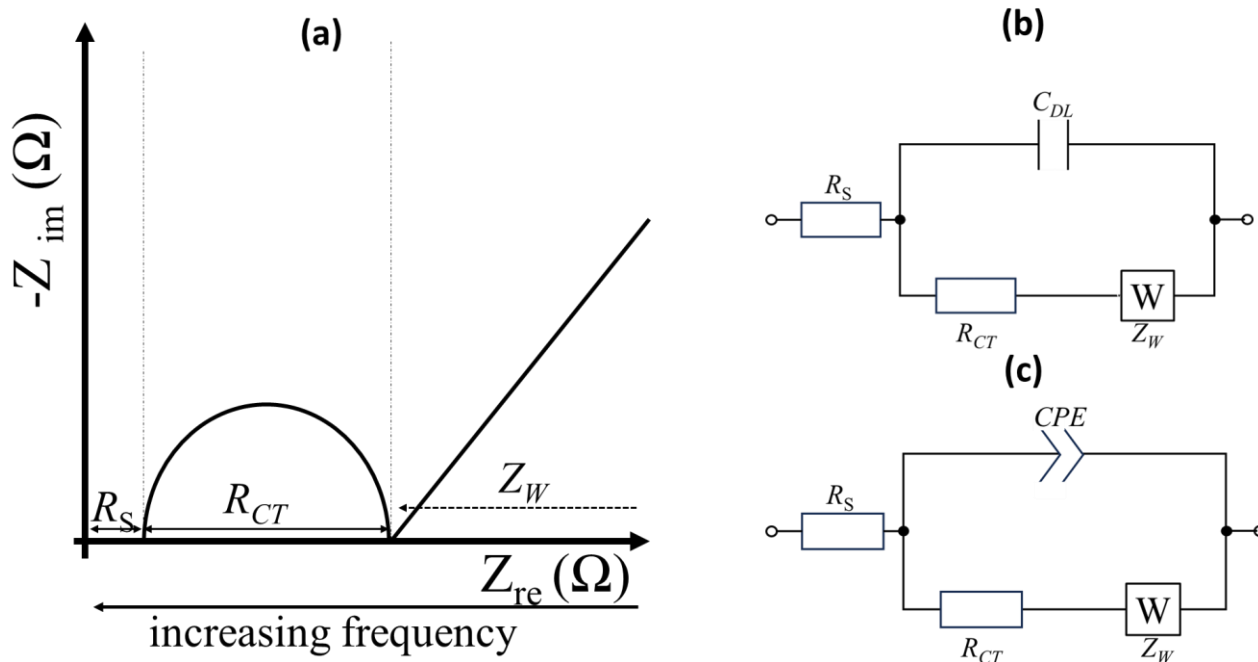

**Figure S2.** (a) Typical EIS spectrum resulting from the Randles circuit shown in the panel (b).  $R_s$  is the electrolyte resistance, and it is in series with the parallel combination of the double layer capacitance ( $C_{DL}$ ) and the Warburg impedance ( $Z_W$ ), which takes into account the diffusion of the reactants to the electrode surface. (c) The non-ideal behaviour of the double layer capacitance is frequently taken into account by replacing it with the constant phase element (CPE).

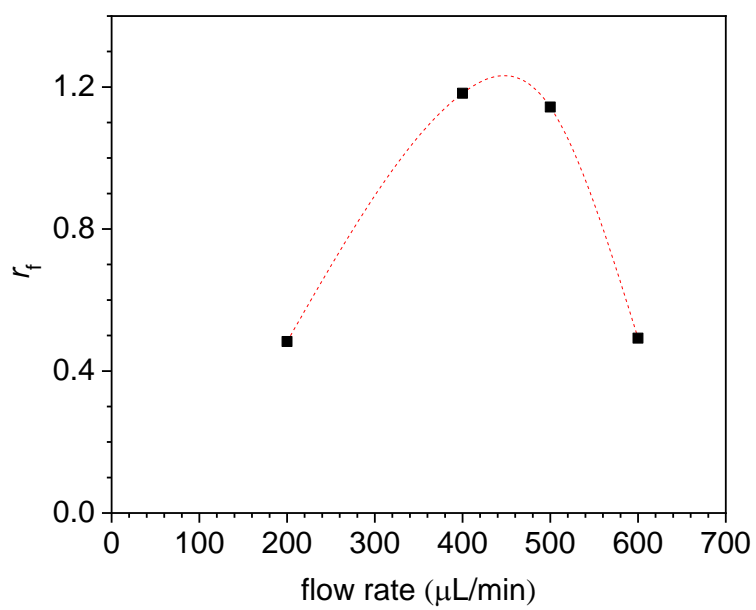

**Figure S3.** The ratio  $r_f$  as a function of the different flow rates investigated (200, 400, 500 and 600  $\mu\text{L}/\text{min}$ ). The dash-dotted line in the figure is a guide for the eye.

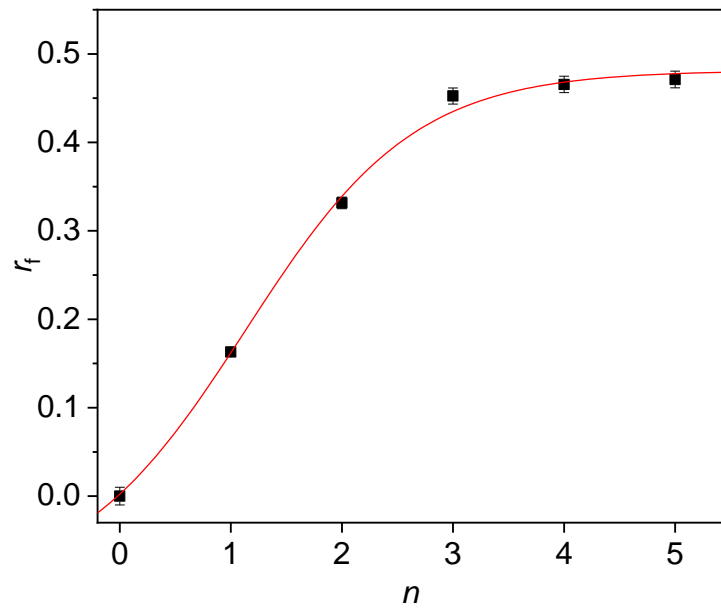

**Figure S4.** The ratio  $r_f$  as a function of the numbers of stage  $n$ , where  $n$  represents the flow of UV-activated antibodies for 15 minutes in the cell and 10 minutes of washing with PBS 1X.

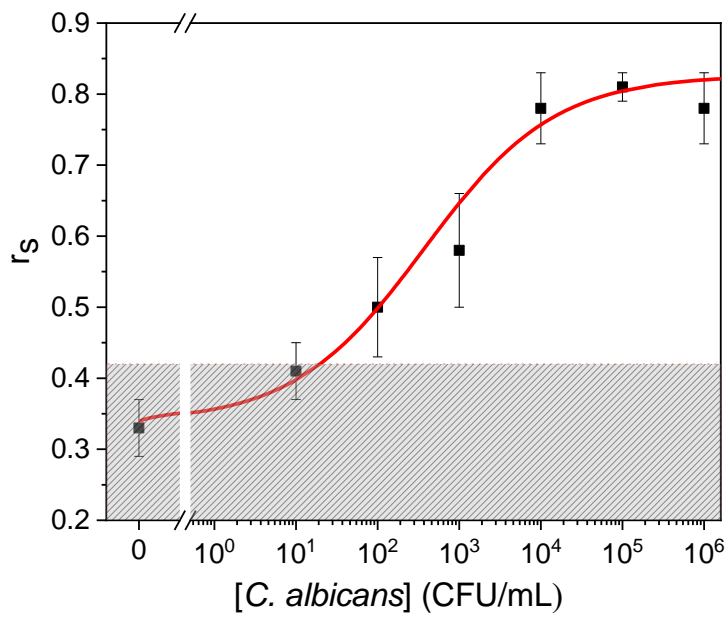

**Figure S5.** Dose-response curve for the detection of *C. albicans* in GYP. The error bar is the result of duplicate or triplicate measurements.
